# Supplementary material for: Global vulnerability of marine mammals to global warming
Source: PubMed Central journal article supplement (PMC6969058; doi:10.1038/s41598-019-57280-3), 2020-01-17
Supplement: 41598_2019_57280_MOESM1_ESM.pdf [file 41598_2019_57280_MOESM1_ESM.pdf]

## **Supplementary Materials for**

### **Global vulnerability of marine mammals to global warming**

Camille Albouy, Valentine Delattre, Giulia Donati, Thomas Frölicher, Severine Albouy-Boyer, Marta Rufino, Loïc Pellissier, David Mouillot, Fabien Leprieur.

**Correspondence to:** [albouycamille@gmail.com](mailto:albouycamille@gmail.com)

This PDF file includes:

Supplementary method 1: Marine mammals traits description.

Supplementary method 2: Statistical sensitivity analysis for the sensitivity index.

Figs. S1 to S6

Tables S1 to S3

## Supplementary method 1 | Marine mammals traits description.

**Table S1 | Marine mammals species traits.** Species traits considered to build the index of sensitivity to global warming. These fifteen traits cover five main categories and were selected to reflect the intrinsic sensitivity to global warming at the species-level. Each trait was divided into three ordered categories in order to quantify the degree to which a species may respond to global warming regarding its biological and ecological features. For each species, the sum of all trait values (between 0 and 2) resulted in an overall species-specific sensitivity ranking (see Methods).

| Categories       | Trait                             | Modalities         |                               |                          |
|------------------|-----------------------------------|--------------------|-------------------------------|--------------------------|
|                  |                                   | 0                  | 1                             | 2                        |
| Feeding          | Diet specialization               | No prey cat. > 50% | At least one prey cat. ≥ 50%  | One prey cat. ≥ 75%      |
|                  | Habitat vertical specialization   | all layers         | benthic or mesopelagic        | epipelagic               |
|                  | Habitat horizontal specialization | all sections       | shelf&slope or slope&offshore | shelf, slope or offshore |
| Habitat          | Temperature range                 | [20;30]            | [10;20[                       | [0;10[                   |
|                  | Temperature minimum               | [16,7;25]          | [8,3;16,7[                    | [0;8,3[                  |
|                  | Range area                        | [3,2;4,7]          | [1,8;3,2[                     | [0,3;1,8[                |
|                  | Range height                      | [99;160[           | [25;99[                       | [0;25]                   |
|                  | Range fragmentation               | 1                  | [2;4]                         | ]4;50[                   |
|                  | Ice concentration                 | [0;0.01]           | 0.5                           | [0.9;1]                  |
| Reproduction     | Female sexual maturity            | [2;6,3[            | [6,3;10,7[                    | [10,7;15]                |
|                  | Weaning                           | [40;60]            | [20;40[                       | [0,1;20[                 |
|                  | Breeding site                     | offshore & coastal | land                          | ice or ice&land          |
|                  | Inter-litter interval             | [12;28[            | [28;44[                       | [44;60]                  |
| Social behaviour | Social group size                 | [0,17;0,983[       | [0,983;1,79[                  | [1,79;2,60]              |
| Biology          | Adult maximum body mass           | [1,40;2,69[        | [2,69;3,97[                   | [3,97;5,26]              |

1) **Diet specialization** is considered a fundamental variable because diet flexibility or ability to consume a variety of prey species should result in decreased sensitivity<sup>1</sup> and has been widely included in such analyses<sup>1-4</sup>. This trait was based on standardized diet composition among 9 prey categories (benthic invertebrates, large zooplankton, small squids, large squids, small pelagic fishes, mesopelagic fishes, miscellaneous fishes, high vertebrates) available for 97 species of marine mammals<sup>5</sup>; missing values were filled in thereafter from scientific literature (e.g., seagrass eaters manatees *Trichechus spp.* and dugong *Dugong dugon* were categorized as specialist feeders). Ranking of diet specialization ranged between 0 (generalist

feeders, i.e. each prey category represents less than 50% of the diet) to 2 (highly specialized feeders, i.e. one prey category represents at least 75% of the diet).

2) **Habitat vertical specialization** is based on a four-modality nominal variable concerning habitat foraging preferences. This variable describes the capacity of the species to use different vertical layers as habitat. Indeed, habitat generalists are more buffered against global warming than habitat specialists because they can occupy a greater variety of habitats<sup>1,6-8</sup>. Species foraging in different habitats were considered as least sensitive (category 0), while those foraging in benthic or mesopelagic layers were noted as intermediate (category 1). Epipelagic feeders were considered the most sensitive ones (category 2).

3) **Habitat horizontal specialization** also concerns foraging preferences according to the distance from the coast. Reflecting habitat specialization, this variable has been widely used in studies upon vulnerability to global warming<sup>1,6-9</sup>. The geomorphological profile was divided into three sections, namely continental shelf, continental slope and offshore. Generalist feeders (i.e. foraging in every section) were noted as least sensitive, species foraging on two sections (both shelf and slope, or both slope and offshore) were intermediately sensitive and species foraging in only one section (either continental shelf, slope or offshore) were noted as most sensitive.

4) **Temperature range** is the difference between maximum and minimum Sea Surface Temperature (SST) encountered throughout the geographical range of a species. This variable is usually included in sensitivity indices regarding global warming amongst and across taxa<sup>6-8,10</sup>. Species encountering the most narrow temperature range were considered highly vulnerable while those encountering the widest range of SST were noted as least sensitive. Data were gathered from<sup>11</sup> for most species. Missing values were filled in *via* the Q-Gis 2.0.1 Dufour software by intersecting IUCN geographical range polygons (<http://iucnredlist.org>) and Bio-ORACLE raster environmental spatial data (<http://www.oracle.ugent.be>).

5) **Temperature minimum** describes the lowest value of SST met inside the geographical range of a species and is a classical variable in such analyses<sup>6,12</sup>. Lowest values reflect high sensitivity to global warming since their thermal requirements might not match environmental conditions anymore with the current and upcoming SST increase<sup>13</sup>. The source of the original data and the methodology to gather trait values were the same as the previous variable.

6) **Range area** is the total surface covered by the geographical range of a species at global scale and it is often used in this context<sup>8,9,14,15</sup>. Widely distributed species should be less vulnerable than narrowly distributed species given regional deviations in the direction and magnitude of climate warming<sup>1,16</sup>. According to the distribution of frequencies for this trait, this variable was log-transformed in order to attenuate the effect of highest values upon the lowest.

7) **Range height** is the difference between the highest latitude occupied by the geographical range of a species and the lowest one. This trait strongly influences the sensitivity of species to global warming<sup>14,17</sup>. In case of latitudinal discontinuous ranges (e.g. True's beaked whale *Mesoplodon mirus*), the total range was decomposed into the sum of these separated areas. The range height was then approximated as the mean height of each of these areas.

8) **Range fragmentation** reflects the number of isolated areas occupied by a species within its global geographical range. Habitat fragmentation is thought to influence extinction and colonization of populations<sup>18</sup> and is known to have synergetic effects with global warming<sup>19</sup>.

Species showing the highest range fragmentation were categorized as highly sensitive, while species with continuous range were considered as the least sensitive<sup>14,17</sup>.

9) **Sea ice concentration** is a key environmental parameter that has been demonstrated to determine marine mammal species presence<sup>20</sup>, since the edge of the pack ice represents an important feeding ground for many species<sup>21</sup>. The reduction or loss of seasonal ice cover associated with global warming has major implications for marine ecosystems. A progressive loss of ice cover would initially increase and eventually reduce or eliminate key habitats for marine mammals, e.g. polynya and ice edge habitats that are important areas for the exchange of energy between ecosystems. We compiled the data set from mean annual sea ice concentration data<sup>22</sup> (United States National Snow & Ice Data Center; NSIDC). Ice-dependent species were categorized as sensitive while ice-independent species (e.g. tropical species) were categorized as less sensitive.

10) **Female sexual maturity** is used as a proxy for speed of life history<sup>23</sup> and it is a reliable predictor of extinction risk across taxa as a proxy for  $R_{max}$ <sup>24</sup>. This trait has been widely used in studies upon extinction risk or vulnerability to global warming, e.g. on mammals<sup>17,24</sup> and fish<sup>3,14,24</sup>. Sexual maturity is also a proxy for several key traits such as life expectancy, growth rate, predation exposure and ecosystem resilience<sup>23</sup>. The earliest mature species were categorized as the least sensitive to global warming. This trait has been considered on females rather than males because of the delay between sexual and social maturity in most Pinnipeds, rendering female sexual maturity more confident as a proxy for age at first reproduction.

11) **Weaning** is the mean duration of lactation. It is believed to reflect sensitivity to global warming as a predictor of growth rate<sup>8,17</sup>. Earliest weaning was linked to high sensitivity.

12) **Breeding site** describes the type of habitat used for mating. It reflects reliance on climate-sensitive habitats and has been used in similar studies<sup>16</sup>. Aquatic (coastal or offshore) mating species were considered as least sensitive. Land mating species were noted as intermediately sensitive. Highly sensitive species require ice habitat for breeding (either ice only or ice and land).

13) **Inter-litter interval** is the duration between two successive calving events. It is believed to be important in assessing the sensitivity to global warming as a proxy for both the reproductive effort<sup>25</sup> and the number of births per year<sup>26</sup>. The shorter is the inter-litter interval, the less sensitive is a species regarding to global warming since the resilience and resistance of the ecosystem is higher<sup>23</sup>.

14) **Social group size** stands for either the harem size of Pinnipeds, the size of the migration group of Mysticetes, or the smallest stable group size of Odontocetes. This log-transformed variable is believed to play a role in assessing the extinction risk of marine mammals<sup>26</sup>.

15) **Maximum body mass** was log-transformed prior to all analysis. This trait has been frequently used in extinction risk and vulnerability studies in a context of global warming<sup>17,26</sup> and can also be seen as a proxy for maximum body length that has also been widely used in this context<sup>3,4,27</sup>. The biggest species were considered as the most sensitive to global warming whereas the smallest ones were categorized as least sensitive. When not available, mean body mass was used instead and missing values were extrapolated from data on maximum body length through an allometric relationship.

## Supplementary method 2 | Statistical sensitivity analysis for the sensitivity index.

For each quantitative trait, the initial categorization was calculated by using the tercile of the whole range of values (Fig. 1A). Four scenarios were performed by moving either the first break (a) or the second one (b) toward the minimum (scenarios a-d and b-d on Fig. 1B) or the maximum values (scenarios a+d and b+d; Fig. 1B). The amount (d) to which we moved the breaks varied between 1% and 33%. For each species, the sum of all trait values (between 0 and 2) resulted in an overall species-specific sensitivity ranking. Resulting values were then divided by the maximum sensitivity value in order to set the index between 0 (least sensitive species) and 1 (most sensitive species). Fig. 1B shows the correlation of Pearson between a given scenario and the initial categorization. Correlation ranging from 0.82 to 1 reflects that moving the breaks does not strongly impact the final results of sensitivity. These results show the robustness of our sensitivity index.

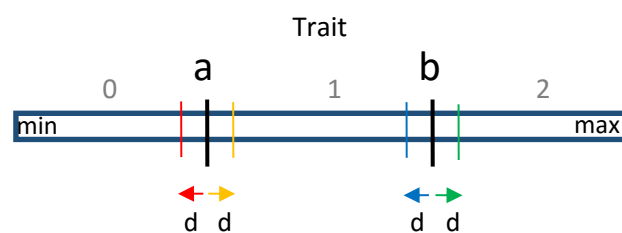

**Fig. S1:** methodology for the computing of the sensitivity analysis. For each trait, the initial categorization was calculated by cutting the whole range of values in three parts of equal range. The sensitivity analysis was performed by moving either the first break (a) or the second one (b) toward the minimum (-) or the maximum (+) values. The amount to which we moved the breaks (called d) varied between 1% and 33%.

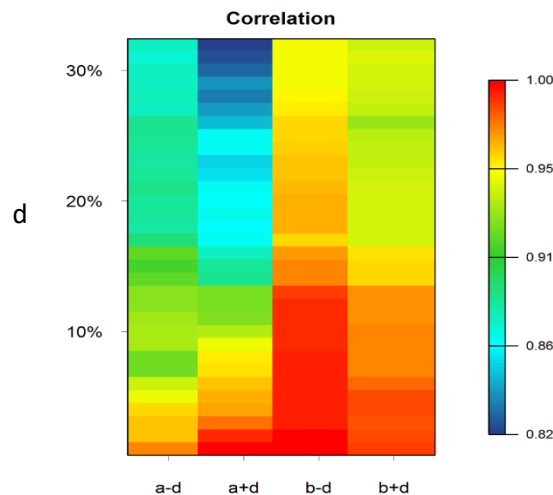

**Fig. S2:** correlation of Pearson between sensitivity resulting from each given scenario and the initial sensitivity results. X-axis shows the scenarios computed by moving either the lower break of categorization (a) or the upper one (b) towards the minimum (-d) or the maximum (+d) values. Y-axis shows the amount (d) to which we tested moving the breaks, from 1% to 33%.

**Fig S3 | Projected mean sea surface temperature difference between the baseline period and the middle of the century and the associated marine mammals vulnerability.**

Projected global warming was estimated using the mean sea surface temperature difference between the baseline period (1971-2000) and the middle of the century (2030-2059) according to the RCP2.6 (a) and RCP8.5 (b) scenarios for 11 different CMIP5 Earth system models (MRI-CGCM3, IPSL-CM5A-LR, GFDL-ESM2G, GFDL-ESM2M, IPSL-CM5A-MR, MIROC-ESM, MPI-ESM-LR, GFDL-CM3, CSIRO, CanESM2). Assemblage-level vulnerability of marine mammals to global warming for the period (2070-2099) based on (c) the emission mitigation scenario with a net radiative forcing by year 2100 of 2.6 W/m<sup>2</sup> (RCP2.6) and (d) the high-carbon emission, business as usual scenario with a net radiative forcing by year 2100 of 8.5 W/m<sup>2</sup> (RCP8.5). To evaluate the vulnerability of marine mammals to global warming at the assemblage level, we averaged the vulnerability of each species occurring in a grid cell (1° x 1° grid-cells, ~10,000-km<sup>2</sup>). Maps were done using R 3.6.0 software (<https://www.r-project.org/>).

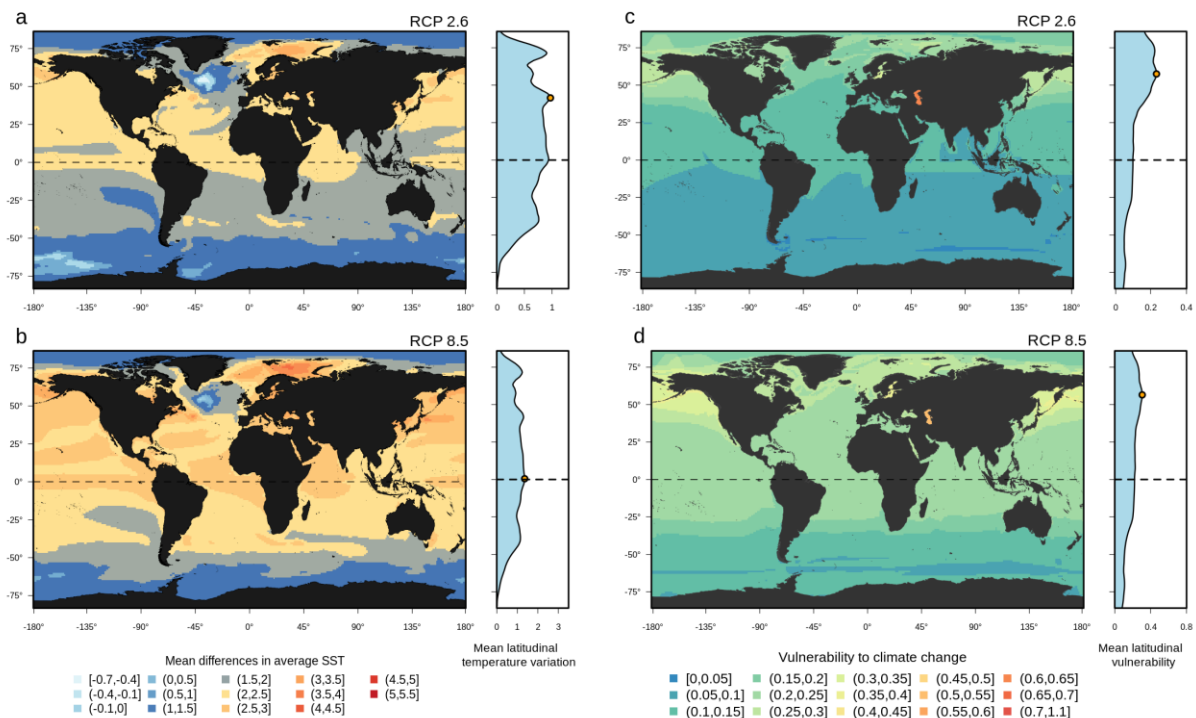

**Fig. S4 | Sensitivity exposure and vulnerability to global warming for marine mammals:** Values distribution of (a) the marine mammals' sensitivity to global warming, (b) the exposure to global warming according to the RCP2.6 and RCP8.5 scenarios and time periods (2030-2059, 2070-2099), (c) the vulnerability exposure to global warming according to both RCPs scenarios and time periods (2030-2059, 2070-2099).

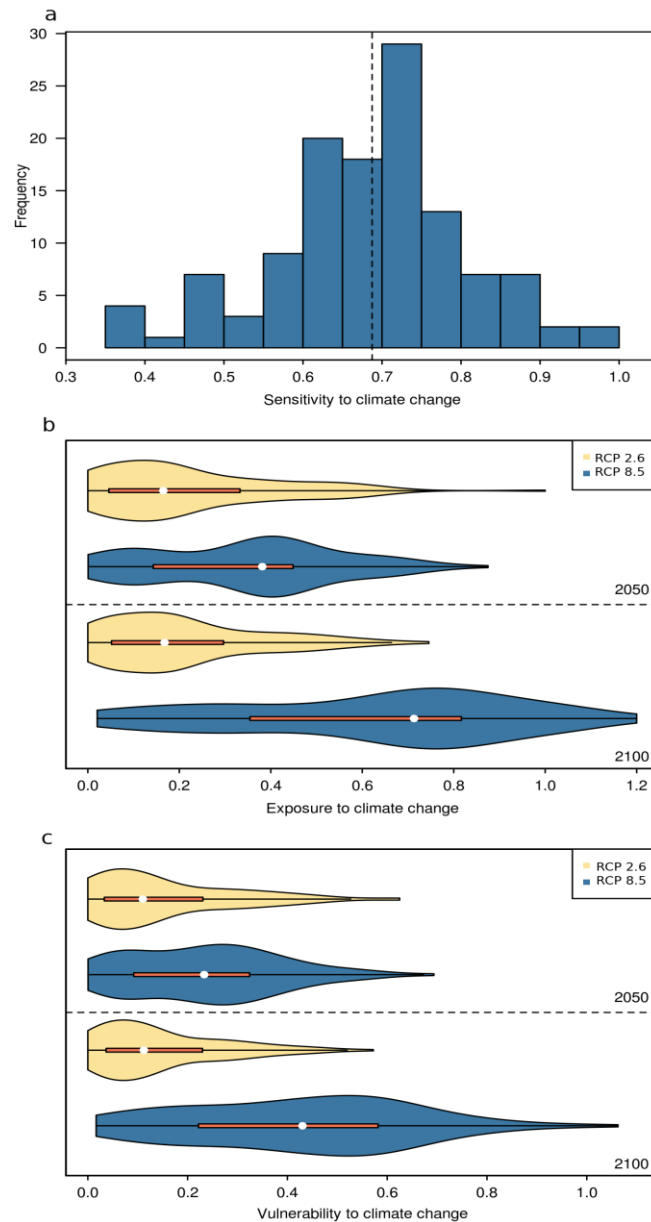

**Table S2 | Ranking of marine mammals according to their vulnerability to global warming.** Here, we present the results for the period (2030-2059) and for the emissions scenarios RCP2.6 and RCP8.5. The IUCN extinction risk categories CR, EN, VU, NT, LC and DD respectively refer to Critically Endangered, Endangered, Vulnerable, Near Threatened, Least Concern and Data Deficient. Vulnerability index is the product of intrinsic sensitivity to global warming by exposure. Sensitivity was based on traits reflecting the degree to which a species may respond to global warming regarding its bio-ecological features. Exposure quantifies the actual change in temperature that a species is likely to face within its geographical range. We evaluated these changes using 11 different CMIP5 Earth system models (MRI-CGCM3, IPSL-CM5A-LR, GFDL-ESM2G, GFDL-ESM2M, IPSL-CM5A-MR, MIROC-ESM, MPI-ESM-LR, GFDL-CM3, CSIRO, CanESM2).

| RCP26                              |             |             |             |          |               | RCP85                              |             |             |          |               |
|------------------------------------|-------------|-------------|-------------|----------|---------------|------------------------------------|-------------|-------------|----------|---------------|
| Species                            | Abreviation | IUCN status | Sensitivity | Exposure | Vulnerability | Species                            | IUCN status | Sensitivity | Exposure | Vulnerability |
| <i>Pusa caspica</i>                | P.casp      | EN          | 0.63        | 1.00     | 0.63          | <i>Eubalaena japonica</i>          | EN          | 1.00        | 0.69     | 0.69          |
| <i>Eubalaena japonica</i>          | E.japo      | EN          | 1.00        | 0.62     | 0.62          | <i>Eschrichtius robustus</i>       | LC          | 0.92        | 0.63     | 0.58          |
| <i>Berardius bairdii</i>           | B.bair      | DD          | 0.88        | 0.55     | 0.48          | <i>Berardius bairdii</i>           | DD          | 0.88        | 0.63     | 0.56          |
| <i>Eschrichtius robustus</i>       | E.rob       | LC          | 0.92        | 0.51     | 0.47          | <i>Pusa caspica</i>                | EN          | 0.63        | 0.88     | 0.55          |
| <i>Mesoplodon stejnegeri</i>       | M.stej      | DD          | 0.73        | 0.62     | 0.45          | <i>Lagenorhynchus obliquidens</i>  | LC          | 0.79        | 0.66     | 0.53          |
| <i>Phoca largha</i>                | P.larg      | LC          | 0.75        | 0.59     | 0.44          | <i>Mesoplodon stejnegeri</i>       | DD          | 0.73        | 0.72     | 0.53          |
| <i>Lagenorhynchus obliquidens</i>  | L.obli      | LC          | 0.79        | 0.55     | 0.43          | <i>Phoca largha</i>                | LC          | 0.75        | 0.68     | 0.51          |
| <i>Enhydra lutris</i>              | E.lutr      | EN          | 0.63        | 0.64     | 0.40          | <i>Lissodelphis borealis</i>       | LC          | 0.75        | 0.66     | 0.49          |
| <i>Lissodelphis borealis</i>       | L.bore      | LC          | 0.75        | 0.53     | 0.40          | <i>Phocoenoides dalli</i>          | LC          | 0.71        | 0.64     | 0.45          |
| <i>Phocoenoides dalli</i>          | P.dall      | LC          | 0.71        | 0.56     | 0.40          | <i>Enhydra lutris</i>              | EN          | 0.63        | 0.72     | 0.45          |
| <i>Mirounga angustirostris</i>     | M.angu      | LC          | 0.75        | 0.50     | 0.38          | <i>Neophocaena asiaorientalis</i>  | EN          | 0.73        | 0.60     | 0.44          |
| <i>Neophocaena asiaorientalis</i>  | N.asia      | EN          | 0.73        | 0.51     | 0.37          | <i>Halichoerus grypus</i>          | LC          | 0.71        | 0.61     | 0.43          |
| <i>Balaena mysticetus</i>          | B.myst      | LC          | 0.88        | 0.41     | 0.36          | <i>Mirounga angustirostris</i>     | LC          | 0.75        | 0.56     | 0.42          |
| <i>Halichoerus grypus</i>          | H.gryp      | LC          | 0.71        | 0.50     | 0.36          | <i>Eumetopias jubatus</i>          | NT          | 0.58        | 0.70     | 0.41          |
| <i>Eumetopias jubatus</i>          | E.juba      | NT          | 0.58        | 0.61     | 0.35          | <i>Balaena mysticetus</i>          | LC          | 0.88        | 0.47     | 0.41          |
| <i>Callorhinus ursinus</i>         | C.ursi      | VU          | 0.58        | 0.58     | 0.34          | <i>Callorhinus ursinus</i>         | VU          | 0.58        | 0.69     | 0.40          |
| <i>Lagenorhynchus albirostris</i>  | L.albi      | LC          | 0.77        | 0.41     | 0.32          | <i>Arctocephalus galapagoensis</i> | EN          | 0.67        | 0.60     | 0.40          |
| <i>Odobenus rosmarus</i>           | O.ros       | VU          | 1.00        | 0.31     | 0.31          | <i>Zalophus wollebaeki</i>         | EN          | 0.67        | 0.60     | 0.40          |
| <i>Phocoena phocoena</i>           | P.phoc      | LC          | 0.63        | 0.49     | 0.31          | <i>Phoca vitulina</i>              | LC          | 0.79        | 0.49     | 0.38          |
| <i>Histriophoca fasciata</i>       | H.fasc      | LC          | 0.58        | 0.52     | 0.31          | <i>Lagenorhynchus albirostris</i>  | LC          | 0.77        | 0.50     | 0.38          |
| <i>Phoca vitulina</i>              | P.vitu      | LC          | 0.79        | 0.38     | 0.30          | <i>Phocoena phocoena</i>           | LC          | 0.63        | 0.61     | 0.38          |
| <i>Eubalaena glacialis</i>         | E.glac      | EN          | 0.88        | 0.33     | 0.29          | <i>Monachus monachus</i>           | EN          | 0.63        | 0.58     | 0.37          |
| <i>Cystophora cristata</i>         | C.cris      | VU          | 0.75        | 0.38     | 0.28          | <i>Eubalaena glacialis</i>         | EN          | 0.88        | 0.42     | 0.36          |
| <i>Monachus monachus</i>           | M.mona      | EN          | 0.63        | 0.45     | 0.28          | <i>Trichechus manatus</i>          | VU          | 0.75        | 0.48     | 0.36          |
| <i>Erignathus barbatus</i>         | E.barb      | LC          | 0.85        | 0.32     | 0.28          | <i>Dugong dugon</i>                | VU          | 0.88        | 0.40     | 0.35          |
| <i>Mesoplodon carlhubbsi</i>       | M.carl      | DD          | 0.63        | 0.43     | 0.27          | <i>Histriophoca fasciata</i>       | LC          | 0.58        | 0.59     | 0.34          |
| <i>Delphinapterus leucas</i>       | D.leuc      | LC          | 0.79        | 0.34     | 0.27          | <i>Hyperoodon ampullatus</i>       | DD          | 0.79        | 0.43     | 0.34          |
| <i>Hyperoodon ampullatus</i>       | H.ampu      | DD          | 0.79        | 0.33     | 0.26          | <i>Cystophora cristata</i>         | VU          | 0.75        | 0.45     | 0.34          |
| <i>Lagenorhynchus acutus</i>       | L.acut      | LC          | 0.63        | 0.40     | 0.25          | <i>Odobenus rosmarus</i>           | VU          | 1.00        | 0.34     | 0.34          |
| <i>Mesoplodon bidens</i>           | M.bide      | DD          | 0.71        | 0.34     | 0.24          | <i>Mesoplodon perrini</i>          | DD          | 0.63        | 0.54     | 0.34          |
| <i>Arctocephalus galapagoensis</i> | A.gala      | EN          | 0.67        | 0.35     | 0.23          | <i>Zalophus californianus</i>      | LC          | 0.67        | 0.49     | 0.32          |
| <i>Phocoena sinus</i>              | P.sinu      | CR          | 0.63        | 0.36     | 0.23          | <i>Erignathus barbatus</i>         | LC          | 0.85        | 0.38     | 0.32          |
| <i>Pagophilus groenlandicus</i>    | P.groe      | LC          | 0.63        | 0.36     | 0.22          | <i>Mesoplodon carlhubbsi</i>       | DD          | 0.63        | 0.51     | 0.32          |
| <i>Zalophus californianus</i>      | Z.cali      | LC          | 0.67        | 0.33     | 0.22          | <i>Trichechus senegalensis</i>     | VU          | 0.79        | 0.41     | 0.32          |
| <i>Mesoplodon perrini</i>          | M.perr      | DD          | 0.63        | 0.34     | 0.21          | <i>Stenella clymene</i>            | DD          | 0.71        | 0.45     | 0.32          |
| <i>Zalophus wollebaeki</i>         | Z.woll      | EN          | 0.67        | 0.30     | 0.20          | <i>Grampus griseus</i>             | LC          | 0.77        | 0.41     | 0.31          |
| <i>Trichechus manatus</i>          | T.mana      | VU          | 0.75        | 0.26     | 0.19          | <i>Sousa teuszii</i>               | CR          | 0.69        | 0.45     | 0.31          |
| <i>Delphinus delphis</i>           | D.delp      | LC          | 0.63        | 0.29     | 0.18          | <i>Lagenodelphis hosei</i>         | LC          | 0.75        | 0.41     | 0.31          |
| <i>Pusa hispida</i>                | P.hisp      | LC          | 0.83        | 0.21     | 0.18          | <i>Delphinapterus leucas</i>       | LC          | 0.79        | 0.38     | 0.30          |
| <i>Arctocephalus townsendi</i>     | A.town      | LC          | 0.67        | 0.25     | 0.17          | <i>Monachus schauinslandi</i>      | EN          | 0.73        | 0.41     | 0.30          |
| <i>Grampus griseus</i>             | G.gris      | LC          | 0.77        | 0.21     | 0.16          | <i>Peponocephala electra</i>       | LC          | 0.75        | 0.40     | 0.30          |
| <i>Stenella clymene</i>            | S.clym      | DD          | 0.71        | 0.22     | 0.16          | <i>Indopacetus pacificus</i>       | DD          | 0.67        | 0.45     | 0.30          |
| <i>Monachus schauinslandi</i>      | M.scha      | EN          | 0.73        | 0.20     | 0.15          | <i>Tursiops aduncus</i>            | DD          | 0.73        | 0.41     | 0.30          |
| <i>Ursus maritimus</i>             | U.mari      | VU          | 0.83        | 0.18     | 0.15          | <i>Mesoplodon bidens</i>           | DD          | 0.71        | 0.42     | 0.30          |
| <i>Delphinus capensis</i>          | D.cape      | DD          | 0.67        | 0.20     | 0.13          | <i>Lagenorhynchus acutus</i>       | LC          | 0.63        | 0.47     | 0.29          |
| <i>Stenella frontalis</i>          | S.fron      | DD          | 0.54        | 0.25     | 0.13          | <i>Balaenoptera omurai</i>         | DD          | 0.71        | 0.41     | 0.29          |
| <i>Sotalia guianensis</i>          | S.guia      | DD          | 0.63        | 0.20     | 0.13          | <i>Delphinus capensis</i>          | DD          | 0.67        | 0.43     | 0.28          |
| <i>Balaenoptera physalus</i>       | B.phys      | EN          | 0.75        | 0.16     | 0.12          | <i>Delphinus delphis</i>           | LC          | 0.63        | 0.45     | 0.28          |
| <i>Lagenodelphis hosei</i>         | L.hose      | LC          | 0.75        | 0.16     | 0.12          | <i>Pagophilus groenlandicus</i>    | LC          | 0.63        | 0.45     | 0.28          |
| <i>Balaenoptera musculus</i>       | B.musc      | EN          | 0.79        | 0.15     | 0.12          | <i>Sotalia guianensis</i>          | DD          | 0.63        | 0.43     | 0.27          |
| <i>Indopacetus pacificus</i>       | I.paci      | DD          | 0.67        | 0.18     | 0.12          | <i>Stenella attenuata</i>          | LC          | 0.71        | 0.38     | 0.27          |
| <i>Sousa teuszii</i>               | S.teus      | CR          | 0.69        | 0.18     | 0.12          | <i>Steno bredanensis</i>           | LC          | 0.67        | 0.39     | 0.26          |
| <i>Physeter macrocephalus</i>      | P.macr      | VU          | 0.73        | 0.16     | 0.12          | <i>Arctocephalus townsendi</i>     | LC          | 0.67        | 0.39     | 0.26          |
| <i>Trichechus senegalensis</i>     | T.sene      | VU          | 0.79        | 0.15     | 0.12          | <i>Stenella longirostris</i>       | DD          | 0.67        | 0.39     | 0.26          |
| <i>Mesoplodon mirus</i>            | M.miru      | DD          | 0.77        | 0.15     | 0.12          | <i>Phocoena sinus</i>              | CR          | 0.63        | 0.42     | 0.26          |
| <i>Peponocephala electra</i>       | P.elec      | LC          | 0.75        | 0.16     | 0.12          | <i>Globicephala macrorhynchus</i>  | DD          | 0.67        | 0.38     | 0.25          |
| <i>Mesoplodon europaeus</i>        | M.euro      | DD          | 0.50        | 0.24     | 0.12          | <i>Sousa chinensis</i>             | VU          | 0.60        | 0.41     | 0.25          |
| <i>Steno bredanensis</i>           | S.bred      | LC          | 0.67        | 0.17     | 0.11          | <i>Orcaella brevirostris</i>       | EN          | 0.65        | 0.38     | 0.24          |



**Table S2**

| RCP26                       |          |    |      |      |      | RCP85                       |    |      |      |      |
|-----------------------------|----------|----|------|------|------|-----------------------------|----|------|------|------|
| Balaenoptera borealis       | B.bore   | EN | 0.71 | 0.16 | 0.11 | Stenella frontalis          | DD | 0.54 | 0.43 | 0.24 |
| Balaenoptera omurai         | B.omur   | DD | 0.71 | 0.16 | 0.11 | Orcaella heinsohni          | VU | 0.58 | 0.40 | 0.23 |
| Orcinus orca                | O.orca   | DD | 0.67 | 0.17 | 0.11 | Pseudorca crassidens        | DD | 0.58 | 0.40 | 0.23 |
| Dugong dugon                | D.dugo   | VU | 0.88 | 0.13 | 0.11 | Neophocaena phocaenoides    | VU | 0.58 | 0.40 | 0.23 |
| Stenella longirostris       | S.long   | DD | 0.67 | 0.16 | 0.11 | Balaenoptera musculus       | EN | 0.79 | 0.29 | 0.23 |
| Stenella attenuata          | S.atte   | LC | 0.71 | 0.15 | 0.11 | Mesoplodon peruvianus       | DD | 0.54 | 0.42 | 0.23 |
| Globicephala macrorhynchus  | G.macr   | DD | 0.67 | 0.16 | 0.11 | Cephalorhynchus heavisidii  | DD | 0.75 | 0.30 | 0.23 |
| Tursiops aduncus            | T.adun   | DD | 0.73 | 0.14 | 0.11 | Balaenoptera physalus       | EN | 0.75 | 0.30 | 0.23 |
| Pseudorca crassidens        | P.cras   | DD | 0.58 | 0.18 | 0.10 | Physeter macrocephalus      | VU | 0.73 | 0.30 | 0.22 |
| Megaptera novaeangliae      | M.nova   | LC | 0.58 | 0.17 | 0.10 | Mesoplodon mirus            | DD | 0.77 | 0.29 | 0.22 |
| Cephalorhynchus heavisidii  | C.heav   | DD | 0.75 | 0.12 | 0.09 | Musa hispida                | LC | 0.83 | 0.26 | 0.22 |
| Stenella coeruleoalba       | S.coer   | LC | 0.50 | 0.17 | 0.09 | Balaenoptera borealis       | EN | 0.71 | 0.30 | 0.21 |
| Mesoplodon peruvianus       | M.peru   | DD | 0.54 | 0.16 | 0.08 | Mesoplodon europaeus        | DD | 0.50 | 0.43 | 0.21 |
| Neophocaena phocaenoides    | N.phoc   | VU | 0.58 | 0.14 | 0.08 | Mesoplodon ginkgodens       | DD | 0.54 | 0.39 | 0.21 |
| Balaenoptera edeni          | B.eden   | DD | 0.50 | 0.17 | 0.08 | Orcinus orca                | DD | 0.67 | 0.30 | 0.20 |
| Arctocephalus pusillus      | A.pusi   | LC | 0.67 | 0.12 | 0.08 | Feresa attenuata            | DD | 0.50 | 0.38 | 0.19 |
| Mesoplodon ginkgodens       | M.gink   | DD | 0.54 | 0.15 | 0.08 | Balaenoptera edeni          | DD | 0.50 | 0.38 | 0.19 |
| Tursiops truncatus          | T.trun   | LC | 0.48 | 0.17 | 0.08 | Stenella coeruleoalba       | LC | 0.50 | 0.37 | 0.19 |
| Feresa attenuata            | F.atte   | DD | 0.50 | 0.16 | 0.08 | Megaptera novaeangliae      | LC | 0.58 | 0.30 | 0.18 |
| Sousa chinensis             | S.chin   | VU | 0.60 | 0.13 | 0.08 | Arctocephalus pusillus      | LC | 0.67 | 0.26 | 0.18 |
| Ziphius cavirostris         | Z.cavi   | LC | 0.42 | 0.19 | 0.08 | Tursiops truncatus          | LC | 0.48 | 0.37 | 0.18 |
| Mesoplodon densirostris     | M.dens   | DD | 0.46 | 0.17 | 0.08 | Mesoplodon densirostris     | DD | 0.46 | 0.37 | 0.17 |
| Monodon monoceros           | M.mono   | LC | 0.88 | 0.08 | 0.07 | Ursus maritimus             | VU | 0.83 | 0.20 | 0.16 |
| Globicephala melas          | G.mela   | DD | 0.75 | 0.10 | 0.07 | Ziphius cavirostris         | LC | 0.42 | 0.37 | 0.15 |
| Kogia breviceps             | K.brev   | DD | 0.38 | 0.17 | 0.07 | Kogia breviceps             | DD | 0.38 | 0.37 | 0.14 |
| Orcaella brevirostris       | O.brev   | EN | 0.65 | 0.10 | 0.06 | Kogia sima                  | DD | 0.38 | 0.37 | 0.14 |
| Kogia sima                  | K.sima   | DD | 0.38 | 0.16 | 0.06 | Cephalorhynchus hectori     | EN | 0.75 | 0.18 | 0.13 |
| Balaenoptera acutorostrata  | B.acut   | LC | 0.35 | 0.17 | 0.06 | Pontoporia blainvillei      | VU | 0.67 | 0.19 | 0.13 |
| Orcaella heinsohni          | O.hein   | VU | 0.58 | 0.10 | 0.06 | Globicephala melas          | DD | 0.75 | 0.17 | 0.13 |
| Pontoporia blainvillei      | P.blai   | VU | 0.67 | 0.07 | 0.05 | Monodon monoceros           | LC | 0.88 | 0.14 | 0.13 |
| Arctocephalus tropicalis    | A.trop   | LC | 0.63 | 0.06 | 0.04 | Balaenoptera acutorostrata  | LC | 0.35 | 0.30 | 0.11 |
| Tasmacetus shepherdi        | T.shep   | DD | 0.81 | 0.04 | 0.03 | Lagenorhynchus obscurus     | DD | 0.67 | 0.15 | 0.10 |
| Balaenoptera bonaerensis    | B.bona   | DD | 0.69 | 0.05 | 0.03 | Balaenoptera bonaerensis    | DD | 0.69 | 0.14 | 0.09 |
| Eubalaena australis         | E.aust   | LC | 0.79 | 0.04 | 0.03 | Arctocephalus tropicalis    | LC | 0.63 | 0.15 | 0.09 |
| Lagenorhynchus obscurus     | L.obscur | DD | 0.67 | 0.05 | 0.03 | Tasmacetus shepherdi        | DD | 0.81 | 0.11 | 0.09 |
| Lobodon carcinophaga        | L.carc   | LC | 0.92 | 0.03 | 0.03 | Caperea marginata           | DD | 0.75 | 0.11 | 0.08 |
| Berardius amuxii            | B.amu    | DD | 0.83 | 0.04 | 0.03 | Mesoplodon hectori          | DD | 0.63 | 0.13 | 0.08 |
| Hyperoodon planifrons       | H.plan   | LC | 0.83 | 0.04 | 0.03 | Arctocephalus forsteri      | LC | 0.63 | 0.12 | 0.08 |
| Caperea marginata           | C.marg   | DD | 0.75 | 0.04 | 0.03 | Eubalaena australis         | LC | 0.79 | 0.09 | 0.07 |
| Mesoplodon bowdoini         | M.bowd   | DD | 0.63 | 0.05 | 0.03 | Otaria flavescens           | LC | 0.67 | 0.11 | 0.07 |
| Mesoplodon hectori          | M.hect   | DD | 0.63 | 0.04 | 0.03 | Lontra felina               | EN | 0.56 | 0.12 | 0.07 |
| Ommatophoca rossii          | O.ross   | LC | 0.81 | 0.03 | 0.03 | Mesoplodon bowdoini         | DD | 0.63 | 0.11 | 0.07 |
| Lissodelphis peronii        | L.pero   | DD | 0.71 | 0.04 | 0.03 | Lissodelphis peronii        | DD | 0.71 | 0.10 | 0.07 |
| Mesoplodon layardii         | M.laya   | DD | 0.63 | 0.04 | 0.03 | Phocoena spinipinnis        | DD | 0.50 | 0.13 | 0.07 |
| Lagenorhynchus cruciger     | L.cruc   | LC | 0.71 | 0.03 | 0.02 | Berardius amuxii            | DD | 0.83 | 0.08 | 0.07 |
| Mirounga leonina            | M.leon   | LC | 0.71 | 0.03 | 0.02 | Mesoplodon traversii        | DD | 0.63 | 0.10 | 0.06 |
| Leptonychotes weddellii     | L.wedd   | LC | 0.85 | 0.03 | 0.02 | Mesoplodon layardii         | DD | 0.63 | 0.10 | 0.06 |
| Arctocephalus forsteri      | A.fors   | LC | 0.63 | 0.03 | 0.02 | Hyperoodon planifrons       | LC | 0.83 | 0.07 | 0.06 |
| Cephalorhynchus hectori     | C.hect   | EN | 0.75 | 0.03 | 0.02 | Arctocephalus australis     | LC | 0.67 | 0.09 | 0.06 |
| Mesoplodon grayi            | M.gray   | DD | 0.58 | 0.03 | 0.02 | Neophoca cinerea            | EN | 0.38 | 0.14 | 0.05 |
| Phocoena dioptrica          | P.diop   | DD | 0.63 | 0.03 | 0.02 | Mesoplodon grayi            | DD | 0.58 | 0.08 | 0.05 |
| Otaria flavescens           | O.flav   | LC | 0.67 | 0.03 | 0.02 | Lagenorhynchus cruciger     | LC | 0.71 | 0.06 | 0.04 |
| Hydrurga leptonyx           | H.lept   | LC | 0.83 | 0.02 | 0.02 | Phocoena dioptrica          | DD | 0.63 | 0.06 | 0.04 |
| Phocoena spinipinnis        | P.spin   | DD | 0.50 | 0.03 | 0.02 | Mirounga leonina            | LC | 0.71 | 0.05 | 0.04 |
| Arctocephalus australis     | A.aust   | LC | 0.67 | 0.02 | 0.01 | Lobodon carcinophaga        | LC | 0.92 | 0.03 | 0.03 |
| Mesoplodon traversii        | M.trav   | DD | 0.63 | 0.02 | 0.01 | Ommatophoca rossii          | LC | 0.81 | 0.03 | 0.02 |
| Lontra felina               | L.feli   | EN | 0.56 | 0.02 | 0.01 | Leptonychotes weddellii     | LC | 0.85 | 0.03 | 0.02 |
| Arctocephalus gazella       | A.gaze   | LC | 0.69 | 0.01 | 0.01 | Hydrurga leptonyx           | LC | 0.83 | 0.02 | 0.02 |
| Arctocephalus philippii     | A.phil   | LC | 0.79 | 0.00 | 0.00 | Arctocephalus gazella       | LC | 0.69 | 0.02 | 0.01 |
| Cephalorhynchus commersonii | C.comm   | LC | 0.79 | 0.00 | 0.00 | Arctocephalus philippii     | LC | 0.79 | 0.01 | 0.01 |
| Cephalorhynchus eutropia    | C.eutr   | NT | 0.79 | 0.00 | 0.00 | Cephalorhynchus eutropia    | NT | 0.79 | 0.00 | 0.00 |
| Lagenorhynchus australis    | L.aust   | DD | 0.75 | 0.00 | 0.00 | Lagenorhynchus australis    | DD | 0.75 | 0.00 | 0.00 |
| Neophoca cinerea            | N.cine   | EN | 0.38 | 0.00 | 0.00 | Cephalorhynchus commersonii | LC | 0.79 | 0.00 | 0.00 |
| Phocarcos hookeri           | P.hook   | EN | 0.71 | 0.00 | 0.00 | Phocarcos hookeri           | EN | 0.71 | 0.00 | 0.00 |

**Table S3 | Ranking of marine mammals according to their vulnerability to global warming.** Here, we present the results for the period (2070-2099) and for the emissions scenarios RCP2.6 and RCP8.5. The IUCN extinction risk categories CR, EN, VU, NT, LC and DD respectively refer to Critically Endangered, Endangered, Vulnerable, Near Threatened, Least Concern and Data Deficient. Vulnerability index is the product of intrinsic sensitivity to global warming by exposure. Sensitivity was based on traits reflecting the degree to which a species may respond to global warming regarding its bio-ecological features. Exposure quantifies the actual change in temperature that a species is likely to face within its geographical range. We evaluated these changes using 11 different CMIP5 Earth system models (MRI-CGCM3, IPSL-CM5A-LR, GFDL-ESM2G, GFDL-ESM2M, IPSL-CM5A-MR, MIROC-ESM, MPI-ESM-LR, GFDL-CM3, CSIRO, CanESM2).

| RCP26                       |              |             |             |          |               | RCP85                       |             |             |          |               |
|-----------------------------|--------------|-------------|-------------|----------|---------------|-----------------------------|-------------|-------------|----------|---------------|
| Species                     | Abbreviation | IUCN status | Sensitivity | Exposure | Vulnerability | Species                     | IUCN status | Sensitivity | Exposure | Vulnerability |
| Eubalaena japonica          | E.japo       | EN          | 1.00        | 0.57     | 0.57          | Eubalaena japonica          | EN          | 1.00        | 1.06     | 1.06          |
| Eschrichtius robustus       | E.robustus   | LC          | 0.92        | 0.52     | 0.47          | Eschrichtius robustus       | LC          | 0.92        | 1.03     | 0.94          |
| Pusa caspica                | P.casp       | EN          | 0.63        | 0.75     | 0.47          | Berardius bairdii           | DD          | 0.88        | 1.03     | 0.90          |
| Mesoplodon stejnegeri       | M.stej       | DD          | 0.73        | 0.61     | 0.45          | Lagenorhynchus obliquidens  | LC          | 0.79        | 1.03     | 0.81          |
| Berardius bairdii           | B.bair       | DD          | 0.88        | 0.49     | 0.43          | Phoca largha                | LC          | 0.75        | 1.07     | 0.80          |
| Lagenorhynchus obliquidens  | L.obli       | LC          | 0.79        | 0.51     | 0.40          | Mesoplodon stejnegeri       | DD          | 0.73        | 1.06     | 0.77          |
| Phoca largha                | P.larg       | LC          | 0.75        | 0.53     | 0.40          | Lissodelphis borealis       | LC          | 0.75        | 1.02     | 0.77          |
| Enhydra lutris              | E.lutr       | EN          | 0.63        | 0.64     | 0.40          | Neophocaena asiaeorientalis | EN          | 0.73        | 1.05     | 0.76          |
| Eumetopias jubatus          | E.juba       | NT          | 0.58        | 0.61     | 0.35          | Pusa caspica                | EN          | 0.63        | 1.20     | 0.75          |
| Phocoenoides dalli          | P.dall       | LC          | 0.71        | 0.50     | 0.35          | Phocoenoides dalli          | LC          | 0.71        | 1.03     | 0.73          |
| Lissodelphis borealis       | L.bore       | LC          | 0.75        | 0.46     | 0.34          | Mirounga angustirostris     | LC          | 0.75        | 0.96     | 0.72          |
| Mirounga angustirostris     | M.angu       | LC          | 0.75        | 0.45     | 0.34          | Odobenus rosmarus           | VU          | 1.00        | 0.70     | 0.70          |
| Neophocaena asiaeorientalis | N.asia       | EN          | 0.73        | 0.44     | 0.32          | Dugong dugon                | VU          | 0.88        | 0.77     | 0.67          |
| Lagenorhynchus albirostris  | L.albi       | LC          | 0.77        | 0.41     | 0.32          | Balaena mysticetus          | LC          | 0.88        | 0.75     | 0.66          |
| Callorhinus ursinus         | C.ursi       | VU          | 0.58        | 0.55     | 0.32          | Enhydra lutris              | EN          | 0.63        | 1.04     | 0.65          |
| Halichoerus grypus          | H.gryp       | LC          | 0.71        | 0.45     | 0.32          | Monachus monachus           | EN          | 0.63        | 1.03     | 0.64          |
| Balaena mysticetus          | B.myst       | LC          | 0.88        | 0.34     | 0.30          | Arctocephalus galapagoensis | EN          | 0.67        | 0.96     | 0.64          |
| Phocoena phocoena           | P.phoc       | LC          | 0.63        | 0.47     | 0.29          | Trichechus senegalensis     | VU          | 0.79        | 0.81     | 0.64          |
| Zalophus californianus      | Z.cali       | LC          | 0.67        | 0.43     | 0.29          | Monachus schauinslandi      | EN          | 0.73        | 0.88     | 0.64          |
| Phoca vitulina              | P.vitu       | LC          | 0.79        | 0.36     | 0.28          | Zalophus wolfebaeki         | EN          | 0.67        | 0.95     | 0.64          |
| Cystophora cristata         | C.cris       | VU          | 0.75        | 0.36     | 0.27          | Trichechus manatus          | VU          | 0.75        | 0.85     | 0.63          |
| Histriophoca fasciata       | H.fasc       | LC          | 0.58        | 0.45     | 0.26          | Eumetopias jubatus          | NT          | 0.58        | 1.06     | 0.62          |
| Eubalaena glacialis         | E.glac       | EN          | 0.88        | 0.30     | 0.26          | Callorhinus ursinus         | VU          | 0.58        | 1.05     | 0.61          |
| Monachus monachus           | M.mona       | EN          | 0.63        | 0.41     | 0.26          | Zalophus californianus      | LC          | 0.67        | 0.91     | 0.61          |
| Odobenus rosmarus           | O.rosm       | VU          | 1.00        | 0.25     | 0.25          | Mesoplodon carlhubbsi       | DD          | 0.63        | 0.97     | 0.60          |
| Lagenorhynchus acutus       | L.acut       | LC          | 0.63        | 0.39     | 0.25          | Stenella clymene            | DD          | 0.71        | 0.84     | 0.59          |
| Hyperoodon ampullatus       | H.ampu       | DD          | 0.79        | 0.31     | 0.24          | Phoca vitulina              | LC          | 0.79        | 0.75     | 0.59          |
| Erignathus barbatus         | E.barb       | LC          | 0.85        | 0.29     | 0.24          | Grampus griseus             | LC          | 0.77        | 0.76     | 0.59          |
| Arctocephalus galapagoensis | A.gala       | EN          | 0.67        | 0.36     | 0.24          | Sousa teuszii               | CR          | 0.69        | 0.85     | 0.58          |
| Zalophus wolfebaeki         | Z.woll       | EN          | 0.67        | 0.35     | 0.23          | Lagenodelphis hosei         | LC          | 0.75        | 0.78     | 0.58          |
| Delphinapterus leucas       | D.leuc       | LC          | 0.79        | 0.29     | 0.23          | Arctocephalus townsendi     | LC          | 0.67        | 0.87     | 0.58          |
| Mesoplodon carlhubbsi       | M.carl       | DD          | 0.63        | 0.36     | 0.22          | Mesoplodon perrini          | DD          | 0.63        | 0.92     | 0.58          |
| Mesoplodon bidens           | M.bide       | DD          | 0.71        | 0.31     | 0.22          | Tursiops aduncus            | DD          | 0.73        | 0.79     | 0.58          |
| Pagophilus groenlandicus    | P.groe       | LC          | 0.63        | 0.35     | 0.22          | Peponocephala electra       | LC          | 0.75        | 0.77     | 0.58          |
| Monachus schauinslandi      | M.scha       | EN          | 0.73        | 0.26     | 0.19          | Halichoerus grypus          | LC          | 0.71        | 0.81     | 0.57          |
| Delphinus delphis           | D.delp       | LC          | 0.63        | 0.27     | 0.17          | Indopacetus pacificus       | DD          | 0.67        | 0.85     | 0.56          |
| Trichechus senegalensis     | T.sene       | VU          | 0.79        | 0.21     | 0.17          | Delphinapterus leucas       | LC          | 0.79        | 0.71     | 0.56          |
| Stenella clymene            | S.clym       | DD          | 0.71        | 0.23     | 0.16          | Phocoena sinus              | CR          | 0.63        | 0.89     | 0.56          |
| Trichechus manatus          | T.mana       | VU          | 0.75        | 0.21     | 0.16          | Delphinus capensis          | DD          | 0.67        | 0.83     | 0.56          |
| Grampus griseus             | G.gris       | LC          | 0.77        | 0.20     | 0.16          | Balaenoptera omurai         | DD          | 0.71        | 0.77     | 0.55          |
| Sousa teuszii               | S.teus       | CR          | 0.69        | 0.22     | 0.15          | Histriophoca fasciata       | LC          | 0.58        | 0.94     | 0.55          |
| Pusa hispida                | P.hisp       | LC          | 0.83        | 0.18     | 0.15          | Erignathus barbatus         | LC          | 0.85        | 0.64     | 0.54          |
| Mesoplodon perrini          | M.perr       | DD          | 0.63        | 0.24     | 0.15          | Phocoena phocoena           | LC          | 0.63        | 0.86     | 0.54          |
| Delphinus capensis          | D.cape       | DD          | 0.67        | 0.21     | 0.14          | Eubalaena glacialis         | EN          | 0.88        | 0.60     | 0.53          |
| Sotalia guianensis          | S.guia       | DD          | 0.63        | 0.22     | 0.14          | Cephalorhynchus heavisidii  | DD          | 0.75        | 0.70     | 0.52          |
| Lagenodelphis hosei         | L.hose       | LC          | 0.75        | 0.18     | 0.13          | Lagenorhynchus albirostris  | LC          | 0.77        | 0.68     | 0.52          |
| Arctocephalus townsendi     | A.town       | LC          | 0.67        | 0.20     | 0.13          | Stenella attenuata          | LC          | 0.71        | 0.74     | 0.52          |
| Stenella frontalis          | S.fron       | DD          | 0.54        | 0.24     | 0.13          | Hyperoodon ampullatus       | DD          | 0.79        | 0.65     | 0.51          |
| Indopacetus pacificus       | I.paci       | DD          | 0.67        | 0.19     | 0.13          | Delphinus delphis           | LC          | 0.63        | 0.82     | 0.51          |
| Peponocephala electra       | P.elec       | LC          | 0.75        | 0.17     | 0.13          | Stenella longirostris       | DD          | 0.67        | 0.77     | 0.51          |
| Phocoena sinus              | P.sinu       | CR          | 0.63        | 0.20     | 0.13          | Steno bredanensis           | LC          | 0.67        | 0.76     | 0.51          |
| Balaenoptera physalus       | B.phys       | EN          | 0.75        | 0.17     | 0.12          | Globicephala macrorhynchus  | DD          | 0.67        | 0.74     | 0.49          |
| Balaenoptera musculus       | B.musc       | EN          | 0.79        | 0.16     | 0.12          | Sousa chinensis             | VU          | 0.60        | 0.79     | 0.48          |
| Physeter macrocephalus      | P.macr       | VU          | 0.73        | 0.17     | 0.12          | Cystophora cristata         | VU          | 0.75        | 0.63     | 0.47          |
| Steno bredanensis           | S.bred       | LC          | 0.67        | 0.18     | 0.12          | Sotalia guianensis          | DD          | 0.63        | 0.75     | 0.47          |
| Stenella attenuata          | S.atte       | LC          | 0.71        | 0.16     | 0.11          | Neophocaena phocaenoides    | VU          | 0.58        | 0.80     | 0.47          |
| Mesoplodon peruvianus       | M.peru       | DD          | 0.54        | 0.21     | 0.11          | Orcaella brevirostris       | EN          | 0.65        | 0.72     | 0.46          |
| Stenella longirostris       | S.long       | DD          | 0.67        | 0.17     | 0.11          | Orcaella heinsohni          | VU          | 0.58        | 0.79     | 0.46          |

**Table S3**

|                             |         |    | RCP26 |      |      | RCP85                       |    |      |      |      |
|-----------------------------|---------|----|-------|------|------|-----------------------------|----|------|------|------|
| Mesoplodon europaeus        | M.euro  | DD | 0.50  | 0.23 | 0.11 | Pseudorca crassidens        | DD | 0.58 | 0.77 | 0.45 |
| Balaenoptera borealis       | B.bore  | EN | 0.71  | 0.16 | 0.11 | Mesoplodon peruvianus       | DD | 0.54 | 0.81 | 0.44 |
| Ursus maritimus             | U.mari  | VU | 0.83  | 0.14 | 0.11 | Mesoplodon bidens           | DD | 0.71 | 0.61 | 0.43 |
| Globicephala macrorhynchus  | G.macr  | DD | 0.67  | 0.17 | 0.11 | Balaenoptera musculus       | EN | 0.79 | 0.54 | 0.43 |
| Orcinus orca                | O.orca  | DD | 0.67  | 0.17 | 0.11 | Cephalorhynchus hectori     | EN | 0.75 | 0.57 | 0.43 |
| Mesoplodon mirus            | M.miru  | DD | 0.77  | 0.14 | 0.11 | Stenella frontalis          | DD | 0.54 | 0.79 | 0.43 |
| Pseudorca crassidens        | P.cras  | DD | 0.58  | 0.19 | 0.11 | Pagophilus groenlandicus    | LC | 0.63 | 0.68 | 0.42 |
| Cephalorhynchus heavisidii  | C.heav  | DD | 0.75  | 0.14 | 0.10 | Balaenoptera physalus       | EN | 0.75 | 0.56 | 0.42 |
| Balaenoptera omurai         | B.omur  | DD | 0.71  | 0.14 | 0.10 | Mesoplodon ginkgodens       | DD | 0.54 | 0.77 | 0.42 |
| Megaptera novaeangliae      | M.nova  | LC | 0.58  | 0.17 | 0.10 | Mesoplodon mirus            | DD | 0.77 | 0.53 | 0.41 |
| Neophocaena phocaenoides    | N.phoc  | VU | 0.58  | 0.16 | 0.09 | Physeter macrocephalus      | VU | 0.73 | 0.56 | 0.41 |
| Mesoplodon ginkgodens       | M.gink  | DD | 0.54  | 0.16 | 0.09 | Balaenoptera borealis       | EN | 0.71 | 0.57 | 0.40 |
| Tursiops aduncus            | T.adun  | DD | 0.73  | 0.12 | 0.09 | Lagenorhynchus acutus       | LC | 0.63 | 0.62 | 0.39 |
| Monodon monoceros           | M.monoc | LC | 0.88  | 0.10 | 0.09 | Mesoplodon europaeus        | DD | 0.50 | 0.78 | 0.39 |
| Dugong dugon                | D.dugo  | VU | 0.88  | 0.10 | 0.09 | Orcinus orca                | DD | 0.67 | 0.56 | 0.37 |
| Stenella coeruleoalba       | S.coer  | LC | 0.50  | 0.17 | 0.08 | Feresa attenuata            | DD | 0.50 | 0.74 | 0.37 |
| Feresa attenuata            | F.atte  | DD | 0.50  | 0.17 | 0.08 | Balaenoptera edeni          | DD | 0.50 | 0.74 | 0.37 |
| Balaenoptera edeni          | B.eden  | DD | 0.50  | 0.16 | 0.08 | Arctocephalus pusillus      | LC | 0.67 | 0.54 | 0.36 |
| Tursiops truncatus          | T.trun  | LC | 0.48  | 0.17 | 0.08 | Stenella coeruleoalba       | LC | 0.50 | 0.72 | 0.36 |
| Ziphius cavirostris         | Z.cavi  | LC | 0.42  | 0.18 | 0.08 | Pusa hispida                | LC | 0.83 | 0.43 | 0.35 |
| Mesoplodon densirostris     | M.dens  | DD | 0.46  | 0.17 | 0.08 | Tursiops truncatus          | LC | 0.48 | 0.71 | 0.34 |
| Globicephala melas          | G.mela  | DD | 0.75  | 0.10 | 0.07 | Pontoporia blainvillei      | VU | 0.67 | 0.50 | 0.34 |
| Arctocephalus pusillus      | A.pusi  | LC | 0.67  | 0.10 | 0.07 | Monodon monoceros           | LC | 0.88 | 0.38 | 0.34 |
| Sousa chinensis             | S.chin  | VU | 0.60  | 0.11 | 0.07 | Mesoplodon densirostris     | DD | 0.46 | 0.72 | 0.33 |
| Kogia breviceps             | K.brev  | DD | 0.38  | 0.17 | 0.06 | Megaptera novaeangliae      | LC | 0.58 | 0.56 | 0.33 |
| Kogia sima                  | K.sima  | DD | 0.38  | 0.16 | 0.06 | Ursus maritimus             | VU | 0.83 | 0.39 | 0.32 |
| Balaenoptera acutorostrata  | B.acut  | LC | 0.35  | 0.17 | 0.06 | Ziphius cavirostris         | LC | 0.42 | 0.69 | 0.29 |
| Orcaella brevirostris       | O.brev  | EN | 0.65  | 0.09 | 0.06 | Kogia sima                  | DD | 0.38 | 0.72 | 0.27 |
| Arctocephalus tropicalis    | A.trop  | LC | 0.63  | 0.09 | 0.05 | Kogia breviceps             | DD | 0.38 | 0.72 | 0.27 |
| Pontoporia blainvillei      | P.blai  | VU | 0.67  | 0.08 | 0.05 | Lagenorhynchus obscurus     | DD | 0.67 | 0.39 | 0.26 |
| Tasmacetus shepherdi        | T.shep  | DD | 0.81  | 0.05 | 0.04 | Globicephala melas          | DD | 0.75 | 0.33 | 0.25 |
| Eubalaena australis         | E.aust  | LC | 0.79  | 0.05 | 0.04 | Tasmacetus shepherdi        | DD | 0.81 | 0.29 | 0.23 |
| Berardius arnuxii           | B.arnu  | DD | 0.83  | 0.04 | 0.04 | Otaria flavescens           | LC | 0.67 | 0.34 | 0.23 |
| Hyperoodon planifrons       | H.plan  | LC | 0.83  | 0.04 | 0.04 | Arctocephalus tropicalis    | LC | 0.63 | 0.35 | 0.22 |
| Arctocephalus gazella       | A.gaze  | LC | 0.69  | 0.05 | 0.04 | Caperea marginata           | DD | 0.75 | 0.29 | 0.22 |
| Lobodon carcinophaga        | L.carc  | LC | 0.92  | 0.04 | 0.04 | Mesoplodon hectori          | DD | 0.63 | 0.33 | 0.21 |
| Leptonychotes weddellii     | L.wedd  | LC | 0.85  | 0.04 | 0.03 | Balaenoptera bonaerensis    | DD | 0.69 | 0.30 | 0.21 |
| Balaenoptera bonaerensis    | B.bona  | DD | 0.69  | 0.05 | 0.03 | Lontra felina               | EN | 0.56 | 0.37 | 0.21 |
| Mirounga leonina            | M.leon  | LC | 0.71  | 0.05 | 0.03 | Arctocephalus australis     | LC | 0.67 | 0.31 | 0.20 |
| Otaria flavescens           | O.flav  | LC | 0.67  | 0.05 | 0.03 | Phocoena spinipinnis        | DD | 0.50 | 0.41 | 0.20 |
| Mesoplodon bowdoini         | M.bowd  | DD | 0.63  | 0.05 | 0.03 | Mesoplodon traversii        | DD | 0.63 | 0.32 | 0.20 |
| Lagenorhynchus obscurus     | L.obsc  | DD | 0.67  | 0.05 | 0.03 | Balaenoptera acutorostrata  | LC | 0.35 | 0.56 | 0.20 |
| Lagenorhynchus cruciger     | L.cruc  | LC | 0.71  | 0.04 | 0.03 | Arctocephalus forsteri      | LC | 0.63 | 0.29 | 0.18 |
| Lissodelphis peronii        | L.pero  | DD | 0.71  | 0.04 | 0.03 | Lissodelphis peronii        | DD | 0.71 | 0.25 | 0.17 |
| Ommatophoca rossii          | O.ross  | LC | 0.81  | 0.04 | 0.03 | Mesoplodon bowdoini         | DD | 0.63 | 0.28 | 0.17 |
| Mesoplodon layardii         | M.laya  | DD | 0.63  | 0.05 | 0.03 | Eubalaena australis         | LC | 0.79 | 0.22 | 0.17 |
| Phocoena dioptrica          | P.diop  | DD | 0.63  | 0.05 | 0.03 | Berardius arnuxii           | DD | 0.83 | 0.18 | 0.15 |
| Lontra felina               | L.feli  | EN | 0.56  | 0.05 | 0.03 | Mesoplodon layardii         | DD | 0.63 | 0.23 | 0.15 |
| Hydrurga leptonyx           | H.lept  | LC | 0.83  | 0.03 | 0.03 | Hyperoodon planifrons       | LC | 0.83 | 0.17 | 0.14 |
| Caperea marginata           | C.marg  | DD | 0.75  | 0.04 | 0.03 | Mesoplodon grayi            | DD | 0.58 | 0.20 | 0.12 |
| Phocoena spinipinnis        | P.spin  | DD | 0.50  | 0.06 | 0.03 | Lagenorhynchus cruciger     | LC | 0.71 | 0.15 | 0.11 |
| Mesoplodon hectori          | M.hect  | DD | 0.63  | 0.04 | 0.03 | Phocoena dioptrica          | DD | 0.63 | 0.16 | 0.10 |
| Mesoplodon grayi            | M.gray  | DD | 0.58  | 0.05 | 0.03 | Mirounga leonina            | LC | 0.71 | 0.12 | 0.09 |
| Arctocephalus australis     | A.aust  | LC | 0.67  | 0.04 | 0.02 | Cephalorhynchus eutropia    | NT | 0.79 | 0.11 | 0.08 |
| Orcaella heinsohni          | O.hein  | VU | 0.58  | 0.02 | 0.01 | Neophoca cinerea            | EN | 0.38 | 0.22 | 0.08 |
| Arctocephalus forsteri      | A.fors  | LC | 0.63  | 0.02 | 0.01 | Lagenorhynchus australis    | DD | 0.75 | 0.10 | 0.07 |
| Mesoplodon traversii        | M.trav  | DD | 0.63  | 0.01 | 0.01 | Arctocephalus philippii     | LC | 0.79 | 0.06 | 0.05 |
| Cephalorhynchus hectori     | C.hect  | EN | 0.75  | 0.01 | 0.01 | Cephalorhynchus commersonii | LC | 0.79 | 0.06 | 0.05 |
| Cephalorhynchus eutropia    | C.eutr  | NT | 0.79  | 0.00 | 0.00 | Arctocephalus gazella       | LC | 0.69 | 0.05 | 0.04 |
| Cephalorhynchus commersonii | C.comm  | LC | 0.79  | 0.00 | 0.00 | Hydrurga leptonyx           | LC | 0.83 | 0.04 | 0.03 |
| Neophoca cinerea            | N.cine  | EN | 0.38  | 0.00 | 0.00 | Phocarctos hookeri          | EN | 0.71 | 0.04 | 0.03 |
| Arctocephalus philippii     | A.phil  | LC | 0.79  | 0.00 | 0.00 | Lobodon carcinophaga        | LC | 0.92 | 0.02 | 0.02 |
| Lagenorhynchus australis    | L.aust  | DD | 0.75  | 0.00 | 0.00 | Leptonychotes weddellii     | LC | 0.85 | 0.02 | 0.02 |
| Phocarctos hookeri          | P.hook  | EN | 0.71  | 0.00 | 0.00 | Ommatophoca rossii          | LC | 0.81 | 0.02 | 0.02 |



**Fig. S6 | Scenario of potential loss of functional richness and phylogenetic diversity in the global marine mammal fauna**

Potential loss of functional richness (A, B) and phylogenetic diversity (C, D) in the global marine mammal fauna according to the RCP2.6 scenario for the end of the century (2070-2099). The upper graphs (A, C) show two erosion scenarios, one repeated 999 times where order of species extinction was selected randomly (dark continuous line) with the corresponding standard deviation and a second where species extinction was selected according to their vulnerability to global warming (green continuous line). The lower graphs (B, D) show two random erosion scenarios. One repeated 999 times where order of species extinction was selected randomly (dark continuous line) and a second with species being grouped according to their IUCN category (Critically Endangered (CR), Endangered (EN), Vulnerable (VU), Near Threatened (NT), Least Concern (LC) and Data Deficient (DD)) prior to randomization. Finally, the lower graph present a scenario (“Vulnerability & IUCN”, multicolor line) with species grouped by IUCN categories and decreasingly ordered within each group according to their vulnerability to global warming. Ranking of species differ between each pair of vulnerability scenarios, preventing from direct comparison.

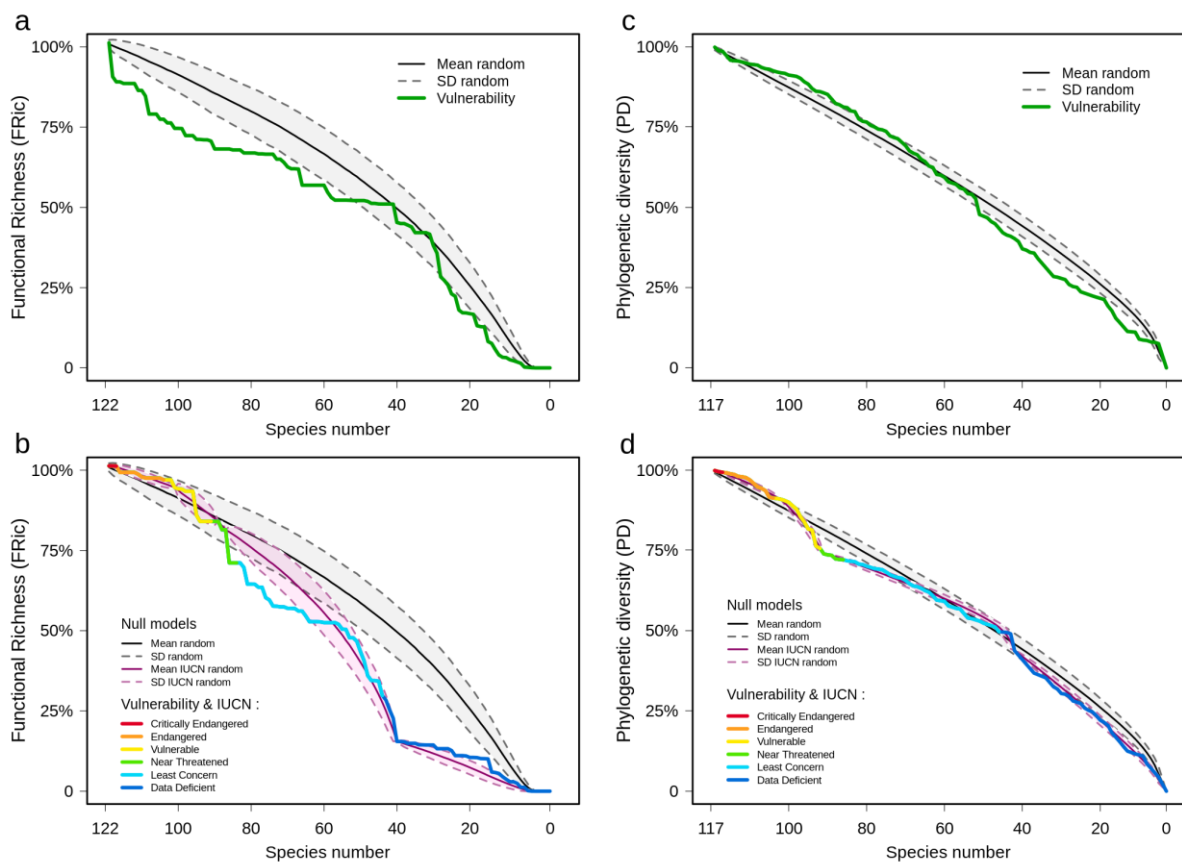

## References Supplementary Information

1. Laidre, K. L. *et al.* Quantifying the sensitivity of Arctic marine mammals to climate-induced habitat change. *Ecol. Appl.* **18**, S97-125 (2008).
2. Pavés, H.J. & González, H.E. Carbon fluxes within the pelagic food web in the coastal area off Antofagasta (23°S), Chile: The significance of the microbial versus classical food webs. *Ecol. Modell.* **212**, 218–232 (2008).
3. Chessman, B.C. Identifying species at risk from climate change: Traits predict the drought vulnerability of freshwater fishes. *Biol. Conserv.* **160**, 40–49 (2013).
4. Olden, J.D., Poff, N.L. & Bestgen, K.R. Trait synergisms and the rarity, extirpation, and extinction risk of desert fishes. *Ecology* **89**, 847–56 (2008).
5. Pauly, D. *et al.* Diet composition and trophic levels of marine mammals. *ICES J. Mar. Sci.* **55**, 467–481 (1998).
6. Rosset, V. & Oertli, B. Freshwater biodiversity under climate warming pressure: Identifying the winners and losers in temperate standing waterbodies. *Biol. Conserv.* **144**, 2311–2319 (2011).
7. Peters, R.L. The Greenhouse Effect and Nature Reserves. *Bioscience* **35**, 707–717 (1985).
8. Garcia, R.A., Araújo, M.B., Burgess, N.D., Foden, W.B., Gutsche, A., Rahbek, C., and Cabeza, M. Matching species traits to projected threats and opportunities from climate change. *J. Biogeogr.* **41**, 724–735 (2014).
9. Davidson, A.D. *et al.* Drivers and hotspots of extinction risk in marine mammals. *Proc. Natl. Acad. Sci.* **109**, 3395–3400 (2012).
10. Schumann, N. *et al.* Impacts of climate change on Australian marine mammals. *Aust. J. Zool.* **61**, 146 (2013).
11. Kaschner, K.B. *et al.* AquaMaps Environmental Dataset: Half-Degree Cells Authority File (HCAF). ver. 5 World Wide Web Electron. Publ., Version 7, (2013).
12. Schumann, N. *et al.* Impacts of climate change on Australian marine mammals. *Aust. J. Zool.* **61**, 146 (2013).
13. IPCC. Fifth Assessment Report Climate Change 2013 : the Physical Science Basis.(2013)
14. Cheung, W. *et al.* Intrinsic vulnerability in the global fish catch. *Mar. Ecol. Prog. Ser.* **333**, 1–12 (2007).
15. Simmonds, M.P. & Isaac, S.J. The impacts of climate change on marine mammals: early signs of significant problems. *Oryx* **41**, 19 (2007)
16. Burek, K.A., Gulland, F.M.D. & O'Hara, T.M. Effects of climate change on arctic marine mammal health. *Ecol. Appl.* **18**, S126–S134 (2008).

17. González-Suárez, M., Gómez, A. & Revilla, E. Which intrinsic traits predict vulnerability to extinction depends on the actual threatening processes. *Ecosphere* **4**, art76 (2013)
18. Warren, M.S. *et al.* Rapid responses of British butterflies to opposing forces of climate and habitat change. *Nature* **414**, 65–69 (2001).
19. Opdam, P. & Wascher, D. Climate change meets habitat fragmentation: linking landscape and biogeographical scale levels in research and conservation. *Biol. Conserv.* **117**, 285–297 (2004).
20. Ribic, C.A., Ainley, D.G. & Fraser, W.R. Habitat selection by marine mammals in the marginal ice zone. *Antarct. Sci.* **3**, 181–186 (1991).
21. Murase, H., Matsuoka, K., Ichii, T. & Nishiwaki, S. Relationship between the distribution of euphausiids and baleen whales in the Antarctic (35°E – 145°W). *Polar Biol.* **25**, 135–145 (2002).
22. Kaschner, K. *et al.* Current and Future Patterns of Global Marine Mammal Biodiversity. *PLoS One* **6**, e19653 (2011).
23. Perrin, W.F., Würsig, B.G. & Thewissen, J.G.M. Encyclopedia of marine mammals (Elsevier/Academic Press) (2009).
24. Hutchings, J.A. *et al.* Life-history correlates of extinction risk and recovery potential. *Ecol. Appl.* **22**, 1061–1067 (2012).
25. Vasquez, R., and Simonetti, J.A. (1999). Life history traits and sensitivity to landscape change: the case of birds and mammals of mediterranean. *Chile. Rev. Chil. Hist. Nat.* **72**, 517–525.
26. Davidson, A.D. *et al.* Drivers and hotspots of extinction risk in marine mammals. *Proc. Natl. Acad. Sci. U. S. A.* **109**, 3395–400 (2012).
27. Cheung, W.W.L., Pauly, D. & Sarmiento, J.L. (2013). How to make progress in projecting climate change impacts. *ICES J. Mar. Sci. J. du Cons.* **70**, 1069–1074.
